# Supplementary material
Source: Springer Nature journal article supplement (https://www.springerprofessional.de/resource/supplementary/13638_2013_1023_MOESM2_ESM.pdf/11899080)

$$\tilde{\mathbf{y}} = \sqrt{\frac{E_s}{M_T}} \mathbf{U}^H \mathbf{H} \mathbf{V} \tilde{\mathbf{x}} + \tilde{\mathbf{n}}, \quad \tilde{\mathbf{n}} = \mathbf{U}^H \mathbf{n}.$$

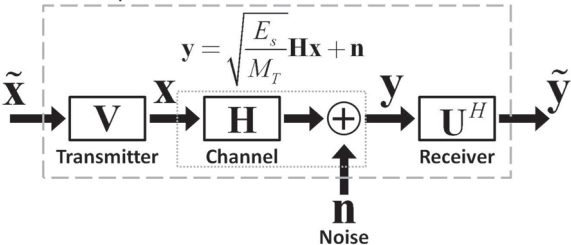

Supplement: MOESM2 [file 11899080]
